# Supplementary material
Source: PubMed Central journal article supplement (PMC6501051)
Supplement: nxy234_supplemental_file.pdf [file nxy234_supplemental_file.pdf]

Supplementary Data

**Supplemental Table 1. Food rankings for calcium, vitamin D and protein among participants in the Boston Puerto Rican Health Study**

| <b>Food Group</b>           | <b>Calcium</b> | <b>Vitamin D<br/>Ranking (1- 10)<sup>1</sup></b> | <b>Protein</b> |
|-----------------------------|----------------|--------------------------------------------------|----------------|
| Nutrition Supplement        | 1              | 1                                                | -              |
| Whole milk                  | 2              | 2                                                | 5              |
| 2% milk                     | 3              | 3                                                | -              |
| Skim milk                   | 4              | 5                                                | -              |
| Processed cheese            | 5              | -                                                | -              |
| Natural cheese              | 6              | -                                                | -              |
| 2% flavored milk            | 7              | 6                                                | -              |
| Yogurt                      | 8              | -                                                | -              |
| Beans                       | 9              | -                                                | 1              |
| Bread (fortified)           | 10             | -                                                | -              |
| Tuna salad                  | -              | 4                                                | -              |
| Cold cereal                 | -              | 7                                                | -              |
| Shell fish                  | -              | 8                                                | 7              |
| 1% milk                     | -              | 9                                                | -              |
| Eggs                        | -              | 10                                               | -              |
| Chicken legs (with skin)    | -              | -                                                | 2              |
| Chicken legs (without skin) | -              | -                                                | 4              |
| White rice                  | -              | -                                                | 3              |
| Deli meat                   | -              | -                                                | 6              |
| Chicken breast              | -              | -                                                | 8              |
| Beef (brisket & steak)      | -              | -                                                | 9              |
| Beef (mixed dishes)         | -              | -                                                | 10             |

<sup>1</sup> Ranking of 1 indicates greatest food contribution to total nutrient intake
